# Supplementary material for: Reducing Macronutrients and Increasing Micronutrient Fertilizers Are Key to Improving the Quality of Pomelo Citrus grandis (L.) Osbeck Cv. “Guanxi”
Source: MDPI journal article supplement (doi:10.3390/agriculture12101711), 2022-10-17
Supplement: s1 [file s1]

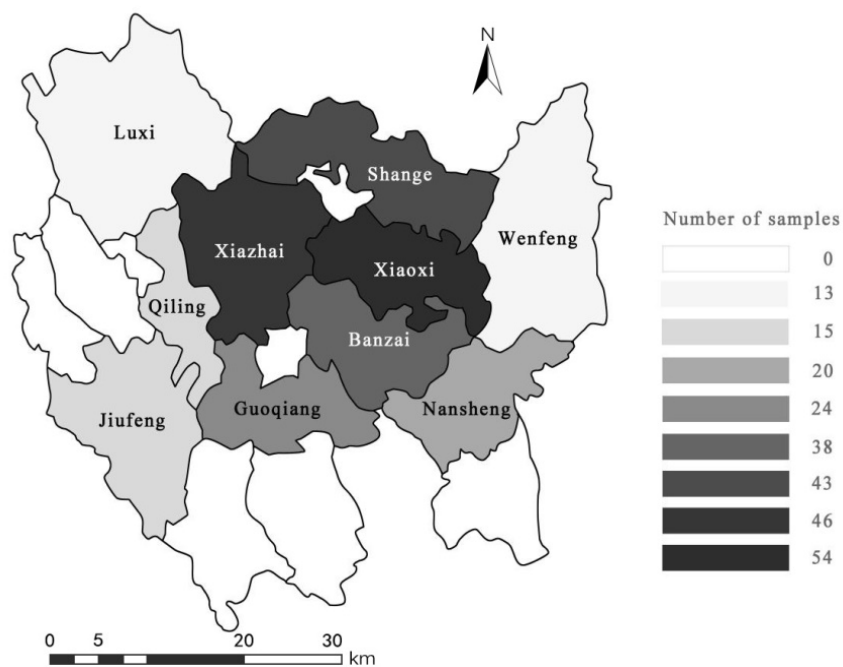

**Figure S1.** Number and location of sampled *Guanxi* pomelo orchards in Pinghe County, Fujian Province, China.

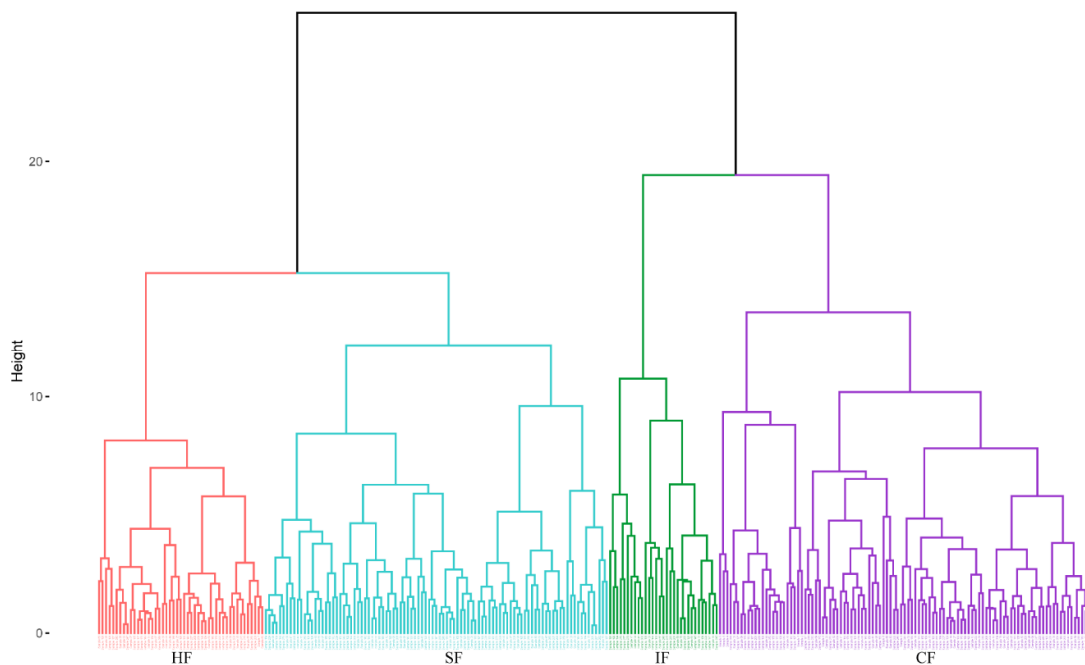

**Figure S2.** Cluster analysis of fruit quality in 281 orchards. HF (47 samples): high-quality fruit, SF (97 samples): sub-quality fruit, CF (106 samples): Common fruit, and IF (31 samples): inferior fruit.

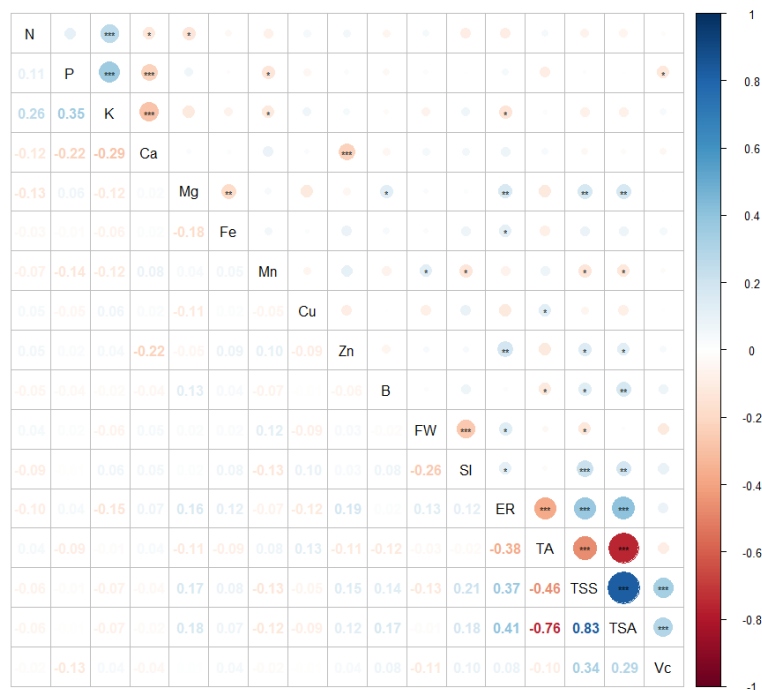

**Figure S3.** Correlation analysis of leaf nutrients and fruit quality (n = 281). \*: p < 0.05, \*\*: p < 0.01, \*\*\*: p < 0.001. FW: Single fruit weight; SI: Fruit shape index; ER: Edible rate; TA: Titratable acidity; TSS: Total soluble solids; TSA: Total soluble solids/Titratable acidity; VC: Vitamin C. N: nitrogen, P:

phosphorus, K: potassium, Ca: calcium, Mg: magnesium, Fe: iron, Mn: manganese, Zn: zinc, B: boron.

**Table S1.** Details the sampling locations in Pinghe County, Fujian Province.

| Sample Sites | Longitude       | Latitude       | Area (km <sup>2</sup> ) |
|--------------|-----------------|----------------|-------------------------|
| Jiufeng      | 116°97′-117°04′ | 24°22′-24°28′  | 203.54                  |
| Yiling       | 117°04′-117°11′ | 24°29′-24°44′  | 127.99                  |
| Banzai       | 117°24′-117°37′ | 24°24′-24°34′  | 133.67                  |
| Guoqiang     | 117°00′-117°26′ | 24°20′-24°29′  | 144.09                  |
| Luxi         | 116°96′-117°10′ | 24°4′7′-24°56′ | 307.40                  |
| Nansheng     | 117°35′-117°40′ | 24°17′-24°28′  | 127.1                   |
| Shange       | 117°19′-117°50′ | 24°39′-24°48′  | 117.72                  |
| Xiazhai      | 117°13′-117°40′ | 24°35′-24°44′  | 203.9                   |
| Xiaoxi       | 117°17′-117°36′ | 24°17′-24°40′  | 137.19                  |
| Wenfeng      | 117°39′-117°48′ | 24°34′-24°51′  | 246.1                   |

Note: Data courtesy of the Baidu Encyclopedia.
